# Supplementary material for: Reprogramming the metabolism of oleaginous yeast for sustainably biosynthesizing the anticarcinogen precursor germacrene A
Source: Royal Society of Chemistry journal article supplement (doi:10.1039/d3gc01661g), 2023-01-01
Supplement: d3gc01661g2.pdf [file d3gc01661g2.pdf]

## Supporting information

### Reprogramming the metabolism of oleaginous yeast for sustainably biosynthesizing the anticarcinogen precursor germacrene A

Qi Liu<sup>a, b, c</sup>, Ge Zhang<sup>b, c</sup>, Liqiu Su<sup>b, c</sup>, Pi Liu<sup>b, c</sup>, Shiru Jia<sup>a</sup>, Qinhong Wang<sup>b, c</sup>, Zongjie Dai<sup>b, c\*</sup>

<sup>a</sup>College of Biotechnology, Tianjin University of Science and Technology, Tianjin 300457, China

<sup>b</sup>Key Laboratory of Engineering Biology for Low-carbon Manufacturing, Tianjin Institute of Industrial Biotechnology, Chinese Academy of Sciences, Tianjin 300308, China

<sup>c</sup>National Center of Technology Innovation for Synthetic Biology, Tianjin 300308, China

\*Correspondence: daizj@tib.cas.cn

#### **This file includes:**

Supplementary Fig. 1-7

Supplementary Table 1-5

Supplementary References

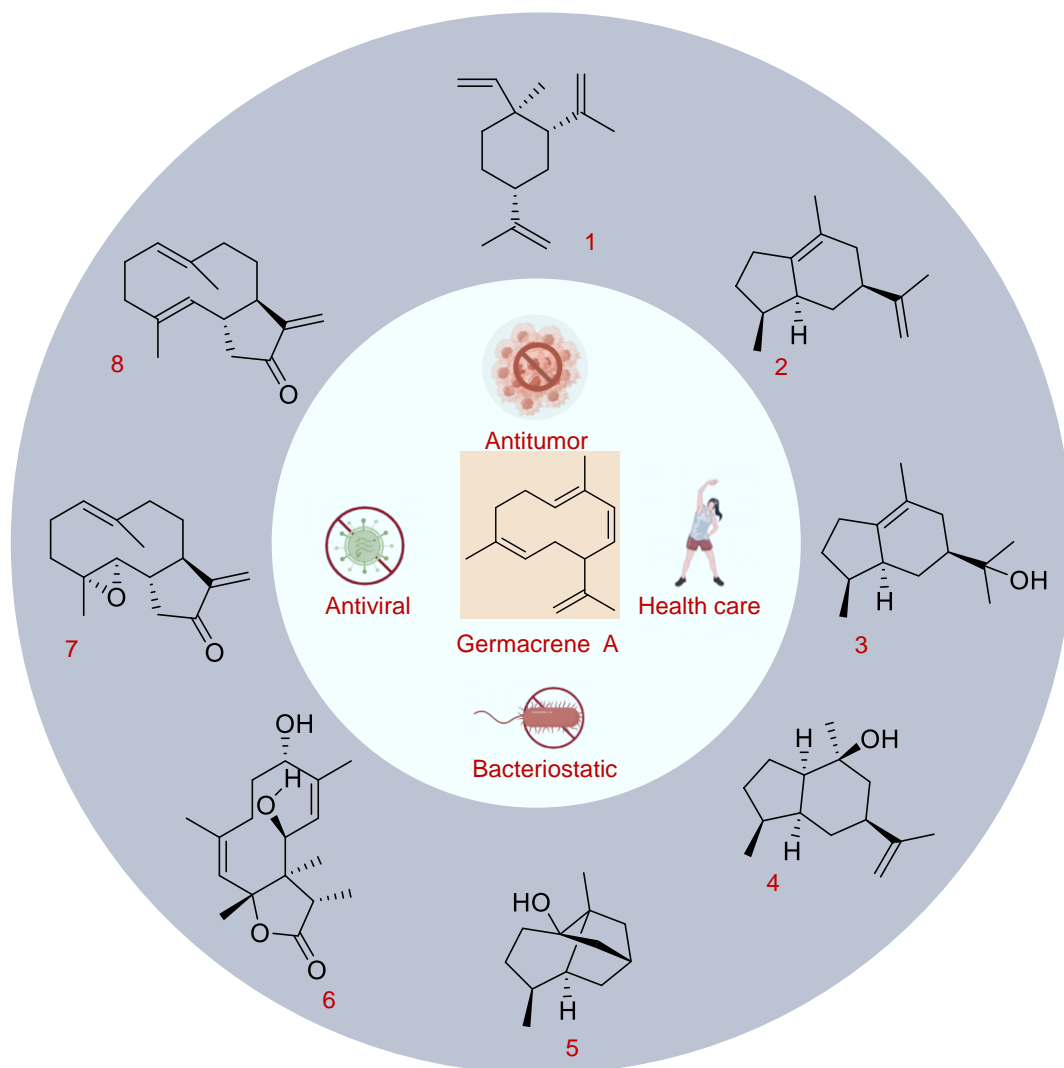

**Fig. 1** The intermediate germacrene A can be converted into various products and their bioactivity. The sesquiterpenes and sesquiterpene lactone derived from germacrene A are :1,  $\beta$ -elemene; 2,  $\delta$ -guaiene; 3, bulnesol; 4, pogostol; 5, patchoulol; 6, germacranolide; 7, parthenolide; 8, costunolide. Fig. S1 was created by Figdraw.

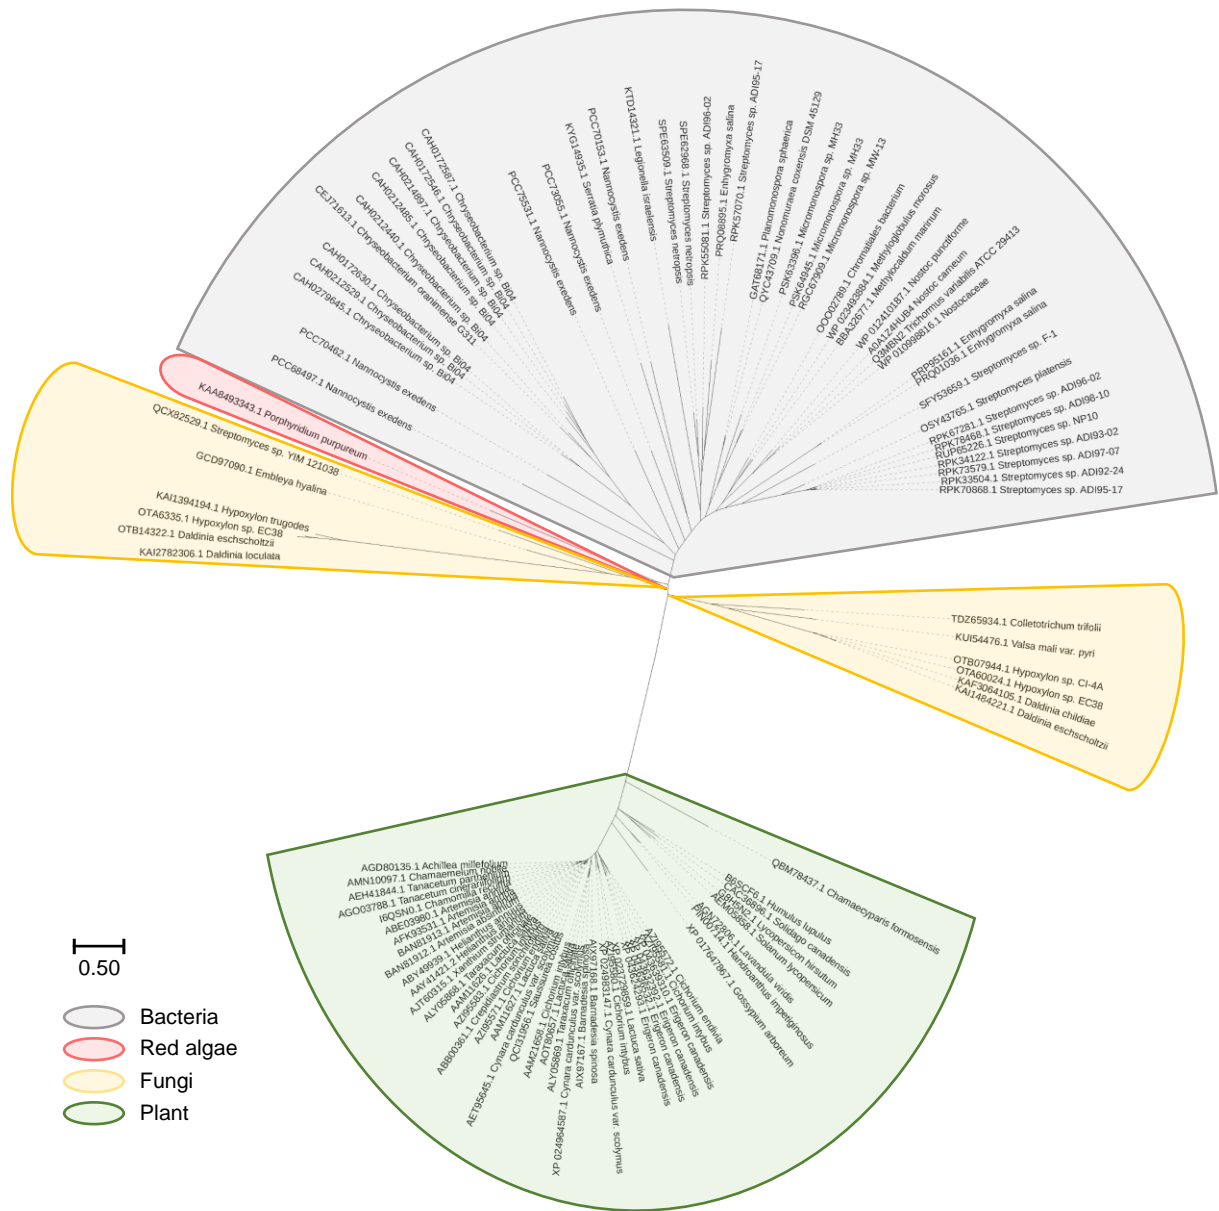

**Fig. 2 Construction of a phylogenetic tree, exhibiting the evolution of germacrene A synthases.** The enzyme sequences were download from NCBI or Uniport. The germacrene A synthases originating from bacteria, red algae, fungi and plant are shown in grayish, pink, light blue and reseda, respectively.

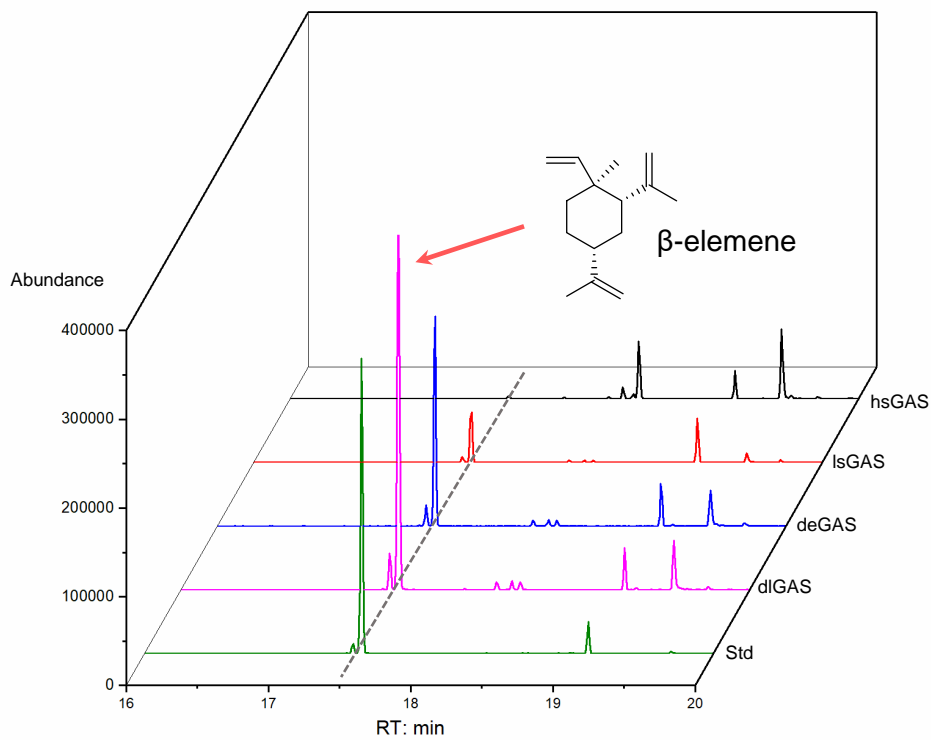

**Fig. 3 GC-MS analysis of shake flask fermentation products in strains expressing dlGAS, deGAS, lsGAS and hsGAS. GC-MS profiles show the same retention time (17.5 minutes) as the  $\beta$ -elemene standard.**

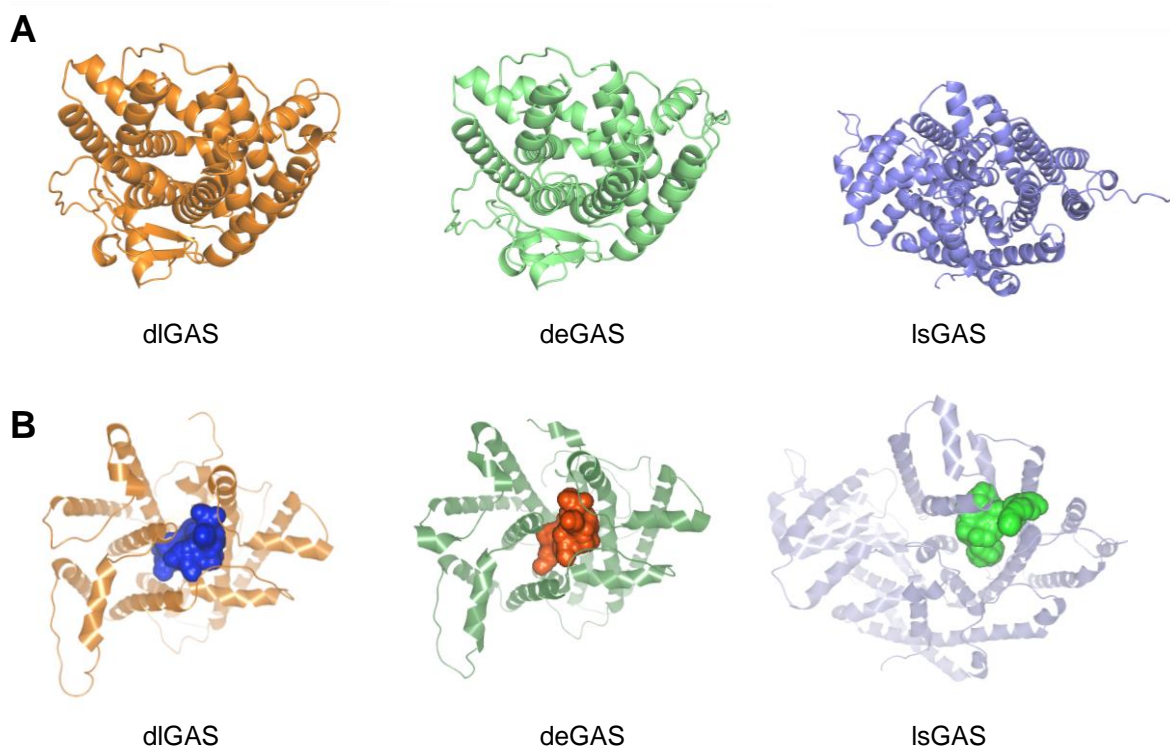

| Structure ID | Pocket Volume (Å <sup>3</sup> ) |
|--------------|---------------------------------|
| dlGAS        | 624.9                           |
| deGS         | 757.1                           |
| lsGAS        | 1617.8                          |

**Fig. 4 Computational analysis of the active cavities of dlGAS, deGAS and lsGAS.**

(A) Protein models of GASs predicted using Alphafold2<sup>1</sup>. (B) The volume of cavities calculated by CAVER Analyst 2.0<sup>2</sup>.

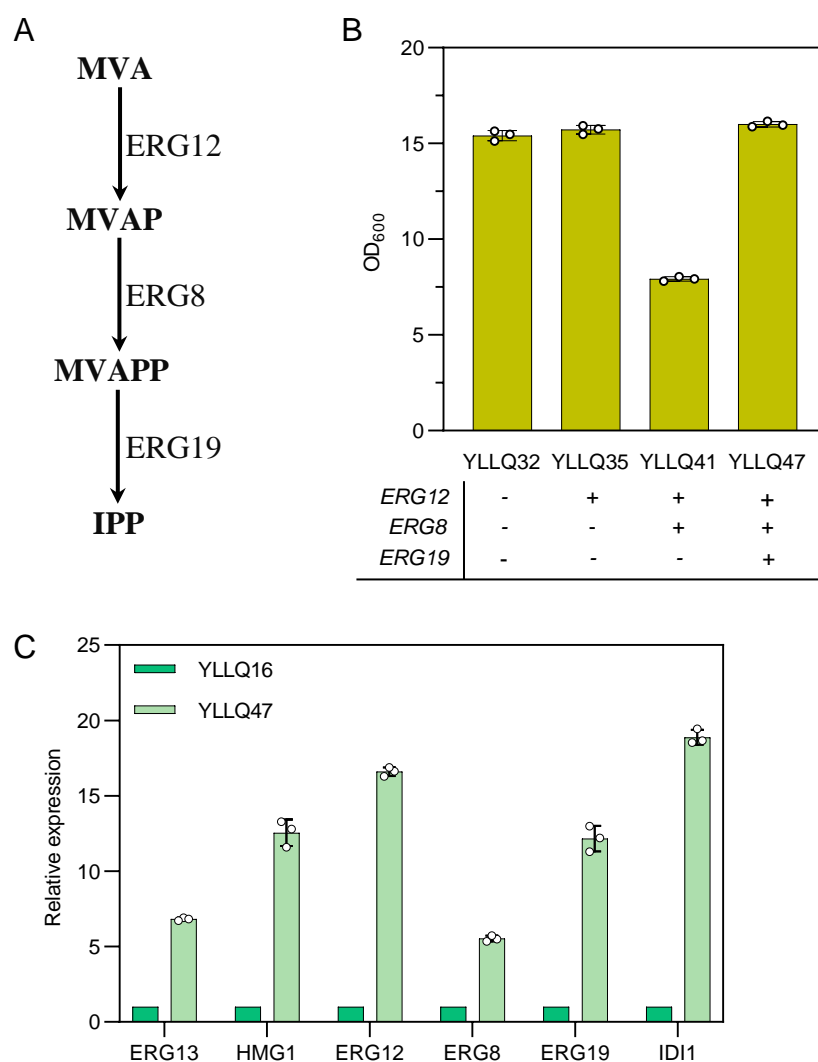

**Fig. 5 Engineering the downstream mevalonate pathway to improve germacrene A production.** (A) Schematic illustration of the enhanced conversion of mevalonate to IPP. (B) Effects of increasing downstream mevalonate pathway on the biomass of engineered strains. MVA, mevalonate; MVAP, 5-phosphomevalonate; MVAPP, 5-diphosphomevalonate; IPP, isopentenyl diphosphate. (C) qRT-PCR analysis of MVA pathway gene transcription levels of engineered strains YLLQ16 and YLLQ47. Error bars correspond to the SD of the mean ( $n = 3$ , corresponding to triplicate biological replicates).

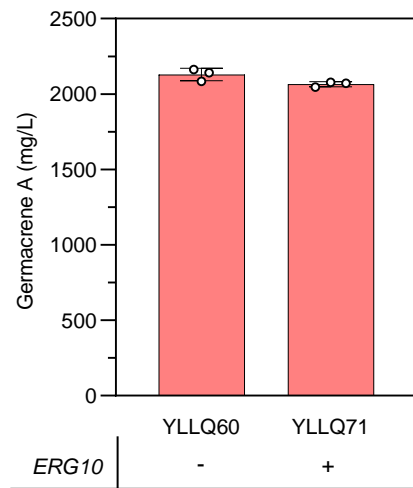

**Fig. 6 Germacrene A production for the ERG10-engineered strain (YLLQ71) based on strain YLLQ60.** Error bars correspond to the SD of the mean (n = 3, corresponding to triplicate biological replicates).

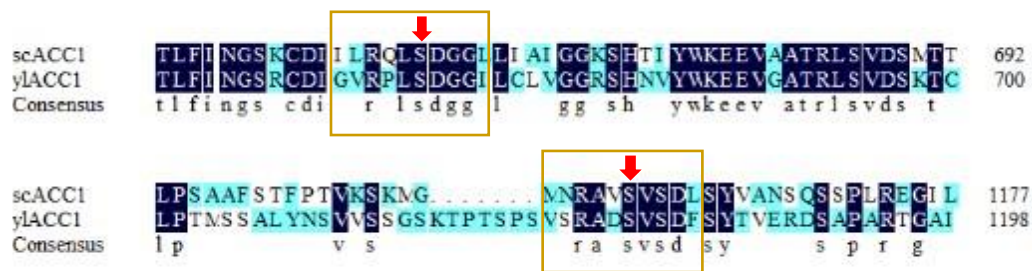

**Fig. 7 Alignment of ACC1p amino acid sequences from *Y. lipolytica* and *S. cerevisiae*.** BLAST analysis of the amino acid sequences was performed with ClustalW and the final format was generated with DNAMAN. Homologous residues are highlighted in deep blue, the brown frames represent the mutated sites and the red arrows represent the phosphorylation sites<sup>3,4</sup>.



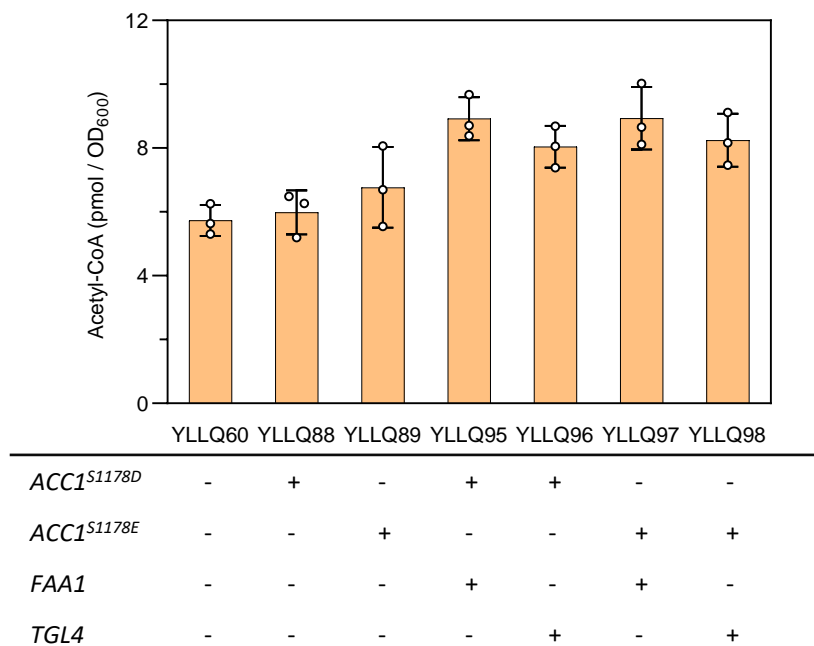

**Fig. 8 Quantification of acetyl-CoA levels in engineered strains cultured for 24 h.**

Error bars correspond to the SD of the mean (n = 3, corresponding to triplicate biological replicates).

## Supplementary Tables

**Table 1. Plasmids and gRNAs used in this study.**

| Name                        | Description                                         | Resource   |
|-----------------------------|-----------------------------------------------------|------------|
| <b>Plasmids</b>             |                                                     |            |
| pCfB3405                    | CEN1, AmpR, P <sub>EXP1</sub> -Nat-T <sub>cyt</sub> | 5          |
| <b>gRNAs</b>                |                                                     |            |
| Int_C2                      | gctcatcggaagaactcct                                 | 5          |
| Int_C3                      | aatagtctatggcttggg                                  | 5          |
| Int_D1                      | gcagacgcagacggagactg                                | 5          |
| Int_E1                      | acaagcatacagccctcggg                                | 5          |
| Int_E3                      | cctgaaatcagtcgatggc                                 | 5          |
| <i>P<sub>HMG1</sub></i>     | acgaaggccacgaaatcaag                                | This study |
| <i>P<sub>IDI1</sub></i>     | agatggagaaatgataccaa                                | This study |
| <i>P<sub>ERG13</sub></i>    | tgcacgggtgtgacgtcggag                               | This study |
| <i>P<sub>ERG12</sub></i>    | taaagttggaagaggacagg                                | This study |
| <i>P<sub>ERG8</sub></i>     | tataggagatttacttatg                                 | This study |
| <i>P<sub>ERG19</sub></i>    | tggtgtgattagtgtttggg                                | This study |
| <i>P<sub>ERG9</sub></i>     | actaacaagtacagttggga                                | This study |
| <i>P<sub>ERG10</sub></i>    | tgtgacgtgagtgagagaga                                | This study |
| <i>ACCI<sup>S667</sup></i>  | ggagttagaccttttctga                                 | This study |
| <i>ACCI<sup>S1178</sup></i> | ggtgtacgaaaagtcggaga                                | This study |

**Table 2. Engineered strains used in this study.**

| <b>Strains</b> | <b>Genotype or relevant characteristics</b>                                                            | <b>Resource</b> |
|----------------|--------------------------------------------------------------------------------------------------------|-----------------|
| W29            |                                                                                                        | NRRL            |
| ZG03           | W29 $\Delta ku70::Cas9, \Delta URA3$                                                                   | This study      |
| YLLQ01         | ZG03 <i>Int_C2::P<sub>TEFin</sub>-neGAS-T<sub>lip2</sub></i>                                           | This study      |
| YLLQ02         | ZG03 <i>Int_C2::P<sub>TEFin</sub>-spGAS-T<sub>lip2</sub></i>                                           | This study      |
| YLLQ03         | ZG03 <i>Int_C2::P<sub>TEFin</sub>-ppGAS-T<sub>lip2</sub></i>                                           | This study      |
| YLLQ04         | ZG03 <i>Int_C2::P<sub>TEFin</sub>-hsGAS-T<sub>lip2</sub></i>                                           | This study      |
| YLLQ05         | ZG03 <i>Int_C2::P<sub>TEFin</sub>-ctGAS-T<sub>lip2</sub></i>                                           | This study      |
| YLLQ06         | ZG03 <i>Int_C2::P<sub>TEFin</sub>-dlGAS-T<sub>lip2</sub></i>                                           | This study      |
| YLLQ07         | ZG03 <i>Int_C2::P<sub>TEFin</sub>-deGAS-T<sub>lip2</sub></i>                                           | This study      |
| YLLQ08         | ZG03 <i>Int_C2::P<sub>TEFin</sub>-hlGAS-T<sub>lip2</sub></i>                                           | This study      |
| YLLQ09         | ZG03 <i>Int_C2::P<sub>TEFin</sub>-lsGAS-T<sub>lip2</sub></i>                                           | This study      |
| YLLQ16         | ZG03 <i>Int_C2::P<sub>TEFin</sub>-dlGAS-GGGGS-ERG20-T<sub>lip2</sub></i>                               | This study      |
| YLLQ17         | ZG03 <i>Int_C2::P<sub>TEFin</sub>-ERG20-GGGGS-dlGAS-T<sub>lip2</sub></i>                               | This study      |
| YLLQ18         | ZG03 <i>Int_C2::P<sub>TEFin</sub>-dlGAS-T<sub>lip2</sub>, P<sub>TEFin</sub>-ERG20-T<sub>lip2</sub></i> | This study      |
| YLLQ22         | YLLQ16 <i>HMG1(-215, 3)::P<sub>TEFin</sub></i>                                                         | This study      |
| YLLQ26         | YLLQ22 <i>ID11(-216, 3)::P<sub>TEFin</sub></i>                                                         | This study      |
| YLLQ32         | YLLQ26 <i>ERG13(-194, 3)::P<sub>TEFin</sub></i>                                                        | This study      |
| YLLQ35         | YLLQ32 <i>ERG12(-84, 3)::P<sub>TEFin</sub></i>                                                         | This study      |
| YLLQ41         | YLLQ35 <i>ERG8(-61, 3)::P<sub>GPD</sub></i>                                                            | This study      |
| YLLQ47         | YLLQ41 <i>ERG19(-52, 0)::P<sub>GPD</sub></i>                                                           | This study      |
| YLLQ52         | YLLQ47 <i>ERG9(-499, 0)::P<sub>ERG9_50bp</sub></i>                                                     | This study      |
| YLLQ58         | YLLQ52 <i>Int_C3::P<sub>TEFin</sub>-dlGAS-T<sub>pex20</sub></i>                                        | This study      |
| YLLQ59         | YLLQ58 <i>Int_D1::P<sub>TEFin</sub>-dlGAS-T<sub>cyc1</sub></i>                                         | This study      |
| YLLQ60         | YLLQ59 <i>Int_E1::P<sub>TEFin</sub>-dlGAS-T<sub>cyc1</sub></i>                                         | This study      |
| YLLQ61         | YLLQ60 <i>Int_E3::P<sub>TEFin</sub>-dlGAS-T<sub>lip2</sub></i>                                         | This study      |
| YLLQ71         | YLLQ60 <i>ERG10(-87, 3)::P<sub>TEFin</sub></i>                                                         | This study      |
| YLLQ86         | YLLQ60 <i>ACC1<sup>S667D</sup></i>                                                                     | This study      |
| YLLQ87         | YLLQ60 <i>ACC1<sup>S667E</sup></i>                                                                     | This study      |
| YLLQ88         | YLLQ60 <i>ACC1<sup>S1178D</sup></i>                                                                    | This study      |
| YLLQ89         | YLLQ60 <i>ACC1<sup>S1178E</sup></i>                                                                    | This study      |
| YLLQ90         | YLLQ60 <i>Int_E3::P<sub>EXP1</sub>-MFE1-T<sub>pex20</sub></i>                                          | This study      |
| YLLQ91         | YLLQ60 <i>Int_E3::P<sub>EXP1</sub>-FAA1-T<sub>pex20</sub></i>                                          | This study      |
| YLLQ92         | YLLQ60 <i>Int_E3::P<sub>EXP1</sub>-PEX10-T<sub>pex20</sub></i>                                         | This study      |
| YLLQ93         | YLLQ60 <i>Int_E3::P<sub>EXP1</sub>-POT1-T<sub>pex20</sub></i>                                          | This study      |
| YLLQ94         | YLLQ60 <i>Int_E3::P<sub>EXP1</sub>-TGL4-T<sub>pex20</sub></i>                                          | This study      |
| YLLQ95         | YLLQ88 <i>Int_E3::P<sub>EXP1</sub>-FAA1-T<sub>pex20</sub></i>                                          | This study      |
| YLLQ96         | YLLQ88 <i>Int_E3::P<sub>EXP1</sub>-TGL4-T<sub>pex20</sub></i>                                          | This study      |
| YLLQ97         | YLLQ89 <i>Int_E3::P<sub>EXP1</sub>-FAA1-T<sub>pex20</sub></i>                                          | This study      |
| YLLQ98         | YLLQ89 <i>Int_E3::P<sub>EXP1</sub>-TGL4-T<sub>pex20</sub></i>                                          | This study      |

**Table 3. List of primers and PCR fragments used in this work.**

| No.                                          | Overlap PCR fragment                                              | PCR fragment | Primer name                                | Sequence (5'-3')                              |                                 |
|----------------------------------------------|-------------------------------------------------------------------|--------------|--------------------------------------------|-----------------------------------------------|---------------------------------|
| <b>For evaluating the efficiency of GASs</b> |                                                                   |              |                                            |                                               |                                 |
| 1                                            | Int_C2-P <sub>TEF<sub>in</sub></sub> -<br>lsGAS-T <sub>lip2</sub> | lsGAS        | Int_C2-up-F                                | aattcgacgacctgaacct                           |                                 |
|                                              |                                                                   |              | Int_C2-up <sup>a</sup>                     | ccgccaaccgggtctcaagcgttgacggtt                |                                 |
|                                              |                                                                   |              | Int_C2-up-R                                | ccatctaagacctacatt                            |                                 |
|                                              |                                                                   |              | Int_C2-dw <sup>a</sup>                     | tctgagtggcctatacctccgagtgtgcagc               |                                 |
|                                              |                                                                   |              | Int_C2-dw-R                                | gcctgataaaaacgcctgtc                          |                                 |
|                                              |                                                                   |              | P <sub>TEF<sub>in</sub></sub> <sup>a</sup> | P <sub>TEF<sub>in</sub></sub> -F <sup>b</sup> | gagaccgggttggcggcgta            |
|                                              |                                                                   |              |                                            | P <sub>TEF<sub>in</sub></sub> -R              | ctgcggttagtactgcaaaaagtgc       |
|                                              |                                                                   |              |                                            | T <sub>lip2</sub> -F <sup>b</sup>             | cttctgttcggaatcaacctc           |
|                                              |                                                                   |              | T <sub>lip2</sub> <sup>a</sup>             | T <sub>lip2</sub> -R                          | aggatagggccactcagatgcattcttgggc |
|                                              |                                                                   |              |                                            |                                               | ggtc                            |
|                                              |                                                                   |              |                                            |                                               | ttgcagtactaaccgcaggcccgctggac   |
|                                              |                                                                   |              |                                            |                                               | accaacgc                        |
|                                              |                                                                   |              |                                            |                                               | gttgattccgaacagaagttacatagacaca |
|                                              |                                                                   |              |                                            |                                               | gagccca                         |
| 2                                            | Int_C2-P <sub>TEF<sub>in</sub></sub> -<br>hlGAS-T <sub>lip2</sub> | hlGAS        | hlGAS-F                                    | ttgcagtactaaccgcagctactcagatctt               |                                 |
|                                              |                                                                   |              | hlGAS-R                                    | cgctc                                         |                                 |
| 3                                            | Int_C2-P <sub>TEF<sub>in</sub></sub> -<br>deGAS-T <sub>lip2</sub> | deGAS        | deGAS-F                                    | ttgcagtactaaccgcagcgacctacacct                |                                 |
|                                              |                                                                   |              | deGAS-R                                    | gttctttc                                      |                                 |
| 4                                            | Int_C2-P <sub>TEF<sub>in</sub></sub> -<br>dlGAS-T <sub>lip2</sub> | dlGAS        | dlGAS-F                                    | gttgattccgaacagaagttagatgccttca               |                                 |
|                                              |                                                                   |              | dlGAS-R                                    | gagagg                                        |                                 |
| 5                                            | Int_C2-P <sub>TEF<sub>in</sub></sub> -<br>ctGAS-T <sub>lip2</sub> | ctGAS        | ctGAS-F                                    | ttgcagtactaaccgcagggtctcagatcc                |                                 |
|                                              |                                                                   |              | ctGAS-R                                    | tggagcc                                       |                                 |
| 6                                            | Int_C2-P <sub>TEF<sub>in</sub></sub> -<br>hsGAS-T <sub>lip2</sub> | hsGAS        | hsGAS-F                                    | gttgattccgaacagaagttacagcaccata               |                                 |
|                                              |                                                                   |              | hsGAS-R                                    | gacagag                                       |                                 |
| 7                                            | Int_C2-P <sub>TEF<sub>in</sub></sub> -<br>ppGAS-T <sub>lip2</sub> | ppGAS        | ppGAS-F                                    | ttgcagtactaaccgcagatgcaaccacc                 |                                 |
|                                              |                                                                   |              | ppGAS-R                                    | ctgctgcg                                      |                                 |
|                                              |                                                                   |              |                                            | gttgattccgaacagaagttacagcagata                |                                 |
|                                              |                                                                   |              |                                            | gacagagagc                                    |                                 |
|                                              |                                                                   |              |                                            | ttgcagtactaaccgcagggtgcaagtggcc               |                                 |
|                                              |                                                                   |              |                                            | gaggccgt                                      |                                 |

|                                                               |                                                                                                                                   |                                     |                                       |                                                 |
|---------------------------------------------------------------|-----------------------------------------------------------------------------------------------------------------------------------|-------------------------------------|---------------------------------------|-------------------------------------------------|
|                                                               |                                                                                                                                   |                                     | ppGAS-R                               | gttgattccgaacagaagttactccttagagtt<br>gtatcgggc  |
| 8                                                             | Int_C2-P <sub>TEF<sub>in</sub></sub> -<br>spGAS-T <sub>lip2</sub>                                                                 | spGAS                               | spGAS-F                               | ttgcagtactaaccgcagcccacatcttcc<br>acccectt      |
|                                                               |                                                                                                                                   |                                     | spGAS-R                               | gttgattccgaacagaagttactgatccacct<br>tcatcagag   |
| 9                                                             | Int_C2-P <sub>TEF<sub>in</sub></sub> -<br>neGAS-T <sub>lip2</sub>                                                                 | neGAS                               | neGAS-F                               | ttgcagtactaaccgcagaccgcagaatc<br>gccgcctc       |
|                                                               |                                                                                                                                   |                                     | neGAS-R                               | gttgattccgaacagaagttatcgacggcg<br>ccgccgt       |
| For fusing dlGAS and ERG20                                    |                                                                                                                                   |                                     |                                       |                                                 |
|                                                               |                                                                                                                                   | dlGAS-<br>GGGGS                     | dlGAS-GGGGS-F                         | gcagtactaaccgcagcaccatcacctg<br>ttcttc          |
| 10                                                            | Int_C2-P <sub>TEF<sub>in</sub></sub> -<br>dlGAS(GGGGS)<br>ERG20-T <sub>lip2</sub>                                                 |                                     | dlGAS-GGGGS-R                         | ggacatagaaccaccaccaccgatgccctt<br>cagagagggc    |
|                                                               |                                                                                                                                   | GGGGS-<br>ERG20                     | GGGGS-ERG20-F                         | ggtggtggtggttctatgtccaaggcgaatt<br>cga          |
|                                                               |                                                                                                                                   |                                     | GGGGS-ERG20-R                         | gttgattccgaacagaagctacttctgtcgctt<br>gtaaadc    |
|                                                               |                                                                                                                                   | ERG20-<br>GGGGS                     | ERG20-GGGGS-F                         | ttgcagtactaaccgcagccaaggcgaat<br>tcgaaagc       |
| 11                                                            | Int_C2-P <sub>TEF<sub>in</sub></sub> -<br>ERG20(GGGGS)<br>dlGAS-T <sub>lip2</sub>                                                 |                                     | ERG20-GGGGS-R                         | tcgatagaaccaccaccaccttctgtcgc<br>ttgtaaadc      |
|                                                               |                                                                                                                                   | GGGGS-<br>dlGAS                     | GGGGS-dlGAS-F                         | ggtggtggtggttctatgcaccatcacct<br>gttc           |
|                                                               |                                                                                                                                   |                                     | GGGGS-dlGAS-R                         | gttgattccgaacagaagttagatgccctca<br>gagagg       |
|                                                               |                                                                                                                                   |                                     | ERG20-F                               | ttgcagtactaaccgcagccaaggcgaat<br>tcgaaag        |
| 12                                                            | Int_C2-P <sub>TEF<sub>in</sub></sub> -<br>dlGAS-T <sub>lip2</sub> -<br>P <sub>TEF<sub>in</sub></sub> -ERG20-<br>T <sub>lip2</sub> | ERG20                               | ERG20-R                               | tgattccgaacagaagctacttctgtcgttgt<br>aaadc       |
| <b>For enhancing the flux of germacrene A synthetic route</b> |                                                                                                                                   |                                     |                                       |                                                 |
|                                                               |                                                                                                                                   |                                     | P <sub>HMG1</sub> -up-F               | cgcgacaggtgatcgaatc                             |
|                                                               |                                                                                                                                   | P <sub>HMG1</sub> -up               | P <sub>HMG1</sub> -up-R               | ccccaaccggctcgtatctgtgccttc<br>gtggtc           |
| 13                                                            | Int-P <sub>TEF<sub>in</sub></sub> -HMG1                                                                                           | P <sub>TEF<sub>in</sub></sub> -HMG1 | P <sub>TEF<sub>in</sub></sub> -HMG1-F | aatcgagaccgggttgccggcgt                         |
|                                                               |                                                                                                                                   |                                     | P <sub>TEF<sub>in</sub></sub> -HMG1-R | gtagctcggttagtactgcaaaaagtgc                    |
|                                                               |                                                                                                                                   |                                     | P <sub>HMG1</sub> -dw-F               | tttgcagtactaaccgcagctacaagcagct<br>attggaagattg |
|                                                               |                                                                                                                                   | P <sub>HMG1</sub> -dw               | P <sub>HMG1</sub> -dw-R               | gatggccttgcaacctgc                              |
| 14                                                            | Int-P <sub>TEF<sub>in</sub></sub> -IDI1                                                                                           | P <sub>IDI1</sub> -up               | P <sub>IDI1</sub> -up-F               | gatgagagttgagagagggc                            |
|                                                               |                                                                                                                                   |                                     | P <sub>IDI1</sub> -up-R               | atctcacctacgattccac                             |

|    |                            |                      |                        |                                                 |
|----|----------------------------|----------------------|------------------------|-------------------------------------------------|
|    |                            | $P_{TEF_{in}}-IDI1$  | $P_{TEF_{in}}-IDI1-F$  | gaaatcgtaggtgaaaatgagaccgggttg<br>gcggcgta      |
|    |                            |                      | $P_{TEF_{in}}-IDI1-R$  | cgctcgcggttagtactgcaaaaagtgc                    |
|    |                            | $P_{IDI1-dw}$        | $P_{IDI1-dw-F}$        | ttgcagtactaaccgcagacgacgtctaca<br>gcgac         |
|    |                            |                      | $P_{IDI1-dw-R}$        | tggccggtatcaattggtgc                            |
|    |                            | $P_{ERG13-up}$       | $P_{ERG13-up-F}$       | cctcggcattttgactcacaagttc                       |
|    |                            |                      | $P_{ERG13-up-R}$       | caaatacggccaaccgggtctcgagtgg<br>tgacatgaacaaggc |
| 15 | Int- $P_{TEF_{in}}-ERG13$  | $P_{TEF_{in}}-ERG13$ | $P_{TEF_{in}}-ERG13-F$ | ctcgagaccgggttgccggcg                           |
|    |                            |                      | $P_{TEF_{in}}-ERG13-R$ | cgactgcggttagtactgcaaaaagt                      |
|    |                            | $P_{ERG13-dw}$       | $P_{ERG13-dw-F}$       | cactttttgcagtactaaccgcagtcgcaacc<br>ccagaacgttg |
|    |                            |                      | $P_{ERG13-dw-R}$       | ctgctgtatctcgtactttcgtcg                        |
|    |                            | $P_{ERG12-up}$       | $P_{ERG12-up-F}$       | aggtcgccttttggtattggtgttg                       |
|    |                            |                      | $P_{ERG12-up-R}$       | cggcccaaccgggtctcgacaggaggaa<br>acctgtggtgta    |
| 16 | Int- $P_{TEF_{in}}-ERG12$  | $P_{TEF_{in}}-ERG12$ | $P_{TEF_{in}}-ERG12-F$ | gagaccgggttgccggcgat                            |
|    |                            |                      | $P_{TEF_{in}}-ERG12-R$ | gtcctcgcggttagtactgcaaaaa                       |
|    |                            | $P_{ERG12-dw}$       | $P_{ERG12-dw-F}$       | ttgcagtactaaccgcagactacatcattc<br>ggcgccaggc    |
|    |                            |                      | $P_{ERG12-up-R}$       | ttctcctccgtccgacttgtgctc                        |
|    |                            | $P_{ERG8-up}$        | $P_{ERG8-up-F}$        | ttctcctccgtccgacttgtgctc                        |
|    |                            |                      | $P_{ERG8-up-R}$        | aggacatcctactgcgtcttaaggttggtg<br>ccagag        |
| 17 | Int- $P_{GPD}-ERG8$        | $P_{GPD}-ERG8$       | $P_{GPD}-ERG8-F$       | ttaagacgcagtaggatgtctcgc                        |
|    |                            |                      | $P_{GPD}-ERG8-R$       | tcattgtgatgtgtttaaattc                          |
|    |                            | $P_{ERG8-dw}$        | $P_{ERG8-dw-F}$        | attaaacacacatcaacaatgatcttcgaccg<br>gctcttc     |
|    |                            |                      | $P_{ERG8-dw-R}$        | tgtgatttgccttcatggc                             |
|    |                            | $P_{ERG19-up}$       | $P_{ERG19-up-F}$       | catgataaaggctccgattc                            |
|    |                            |                      | $P_{ERG19-up-R}$       | aggacatcctactgcgtctgggtggtgtaac<br>ctttttttc    |
| 18 | Int- $P_{GPD}-ERG19$       | $P_{GPD}-ERG19$      | $P_{GPD}-ERG19-F$      | ccagacgcagtaggatgtctcgc                         |
|    |                            |                      | $P_{GPD}-ERG19-R$      | cattgttgatgtgtttaaattc                          |
|    |                            | $P_{ERG19-dw}$       | $P_{ERG19-dw-F}$       | attaaacacacatcaacaatgatccaccagg<br>cctccac      |
|    |                            |                      | $P_{ERG19-dw-R}$       | cactccactcacaagacctc                            |
|    |                            | $P_{ERG9-50bp-up}$   | $P_{ERG9-50bp-up-F}$   | gttgtcgatataggctgagc                            |
| 19 | Truncated- $P_{ERG9-50bp}$ |                      | $P_{ERG9-50bp-up-R}$   | atattagcaacacgatctac                            |
|    |                            | $P_{ERG9-50bp-dw}$   | $P_{ERG9-50bp-dw-F}$   | agatcgtgttgctaataatggacacaaactcg<br>ctgttc      |

|                                             |                                                     |                           |                              |                                   |
|---------------------------------------------|-----------------------------------------------------|---------------------------|------------------------------|-----------------------------------|
|                                             |                                                     |                           | P <sub>ERG9-50bp-dw</sub> -R | cgaaaatctctcggggtgac              |
|                                             |                                                     |                           | P <sub>ERG10-up</sub> -F     | ccacctgcgaaatcatgac               |
|                                             |                                                     | P <sub>ERG10-up</sub>     | P <sub>ERG10-up</sub> -R     | caaatacgccccaacccgggtctcagagg     |
|                                             |                                                     |                           |                              | gaacacgacgatgac                   |
| 20                                          | Int-P <sub>TEFin</sub> -ERG10                       | P <sub>TEFin</sub> -ERG10 | P <sub>TEFin</sub> -ERG10-F  | ctctgagaccgggtggcggcgta           |
|                                             |                                                     |                           | P <sub>TEFin</sub> -ERG10-R  | gctcctcggttagtactgcaaaaagtgc      |
|                                             |                                                     | P <sub>ERG10-dw</sub>     | P <sub>ERG10-dw</sub> -F     | cacttttgcagtactaaccgcaggagcccc    |
|                                             |                                                     |                           |                              | tctacattgttctactgc                |
|                                             |                                                     |                           | P <sub>ERG10-up</sub> -R     | cagaccgtctcgctggatac              |
| <b>For optimizing copy numbers of dlGAS</b> |                                                     |                           |                              |                                   |
|                                             |                                                     | Int_C3-up                 | Int_C3-up-F                  | cattcatgttagttgcgttacagtgtctatcaa |
|                                             |                                                     |                           |                              | c                                 |
|                                             |                                                     |                           | Int_C3-up-R                  | aggaaaggagaactgaggtc              |
|                                             |                                                     | C3-P <sub>TEFin</sub>     | C3-P <sub>TEFin</sub> -F     | ggcgagaccgggtggcggcgta            |
|                                             |                                                     |                           | C3-P <sub>TEFin</sub> -R     | gtcgtcggttagtactgcaaaaagtgc       |
|                                             |                                                     |                           | C3-dlGAS-F                   | tttgcagtactaaccgcagcagaccatcacc   |
| 21                                          | Int_C3-P <sub>TEFin</sub> -dlGAS-T <sub>pex20</sub> | C3-dlGAS                  | C3-dlGAS-F                   | tgttcttcg                         |
|                                             |                                                     |                           | C3-dlGAS-R                   | acttccccatccacttttagatgcccttcag   |
|                                             |                                                     |                           |                              | agagg                             |
|                                             |                                                     | C3-T <sub>pex20</sub> -   | T <sub>pex20</sub> -F        | aaaagtgtggatggggaagtga            |
|                                             |                                                     |                           | T <sub>pex20</sub> -R        | gtaacgcaactaatgaatgaatac          |
|                                             |                                                     |                           | Int_C3-dw-F                  | gtgtatcatatcgaccaac               |
|                                             |                                                     | Int_C3                    | Int_C3-dw-R                  | cgccccaacccgggtctcgccatagcacta    |
|                                             |                                                     |                           |                              | ttgtagag                          |
|                                             |                                                     |                           | Int_D1-up-F                  | aaggtttgggacgctcgacattgctctaac    |
|                                             |                                                     | Int_D1-up                 | Int_D1-up-R                  | actctg                            |
|                                             |                                                     |                           | Int_D1-up-R                  | tgaattgagcagcttggtac              |
|                                             |                                                     | D1-P <sub>TEFin</sub>     | D1-P <sub>TEFin</sub> -F     | cagagagaccgggtggcggcgta           |
|                                             |                                                     |                           | D1-P <sub>TEFin</sub> -R     | gtcgtcggttagtactgcaaaaagtgtgc     |
|                                             |                                                     |                           |                              | gtc                               |
|                                             |                                                     |                           | D1-dlGAS-F                   | cacttttgcagtactaaccgcagcagccat    |
| 22                                          | Int_D1-P <sub>TEFin</sub> -dlGAS-T <sub>CYC1</sub>  | D1-dlGAS                  | D1-dlGAS-F                   | cacctgttcttc                      |
|                                             |                                                     |                           | D1-dlGAS-R                   | attacatgattagatgcccttcagagagg     |
|                                             |                                                     | T <sub>CYC1</sub>         | D1-T <sub>CYC1</sub> -F      | ggcatctaatactgtaattagttatgtca     |
|                                             |                                                     |                           | D1-T <sub>CYC1</sub> -R      | gtccgagcgtccaaaaccttctc           |
|                                             |                                                     |                           | Int_D1-dw-F                  | tcttcttccccacacatc                |
|                                             |                                                     | Int_D1-dw                 | Int_D1-dw-R                  | cgccccaacccgggtctctctgctgtgctg    |
|                                             |                                                     |                           |                              | tttgtgc                           |
|                                             |                                                     |                           | Int_E1-up-F                  | gaaggtttgggacgctcgaagcactatcct    |
| 23                                          | Int_E1-P <sub>TEFin</sub> -dlGAS-T <sub>CYC1</sub>  | Int_E1-up                 | Int_E1-up-R                  | ctgctgag                          |
|                                             |                                                     |                           |                              | gggggagcttaatatgatgc              |
|                                             |                                                     | E1-P <sub>TEFin</sub>     | E1-P <sub>TEFin</sub> -F     | gacacaagagaccgggtggcggcgta        |

|                                         |                                                        |                       |                          |                                                                    |
|-----------------------------------------|--------------------------------------------------------|-----------------------|--------------------------|--------------------------------------------------------------------|
|                                         |                                                        |                       | E1-P <sub>TEFin</sub> -R | gtcgtgcggtagtactgcaaaaagtctg<br>gtc                                |
|                                         |                                                        | E1-dIGAS              | E1-dIGAS-F               | tttgcagtactaaccgcagcgacctacc<br>tgttcttcgac                        |
|                                         |                                                        |                       | E1-dIGAS-R               | attacatgattagatgcccttcagagggc<br>gggcatctaatacatgtaattagttatgcacgc |
|                                         |                                                        | E1-T <sub>CYC1</sub>  | E1-T <sub>CYC1</sub> -F  | t<br>gtgcttcgagcgtccaaaaccttctca                                   |
|                                         |                                                        |                       | E1-T <sub>CYC1</sub> -R  | ccgtctctctacagattc                                                 |
|                                         |                                                        | Int_E1-dw             | Int_E1-dw-F              | cgccccaaccggctcttctgtcgaata<br>caacagc                             |
|                                         |                                                        |                       | Int_E1-dw-R              |                                                                    |
|                                         |                                                        |                       | Int_E3-up-F              | ccaatggatgcgctattc                                                 |
|                                         |                                                        | Int_E3-up             | Int_E3-up-F              | cgccccaaccggctctctgttctgtcttg<br>agtttg                            |
|                                         |                                                        |                       | Int_E3-up-R              |                                                                    |
|                                         |                                                        | E3-P <sub>TEFin</sub> | E3-P <sub>TEFin</sub> -F | caaacagagaccgggtggcggcgta<br>tgggtcgtcggtagtactgcaaaaagtg          |
|                                         |                                                        |                       | E3-P <sub>TEFin</sub> -R | ctg                                                                |
|                                         |                                                        |                       | E3-dIGAS-F               | tttgcagtactaaccgcagcgacctacc<br>tgttcttcgac                        |
| 24                                      | Int_E3-P <sub>TEFin</sub> -<br>dIGAS-T <sub>lip2</sub> | E3-dIGAS              | E3-dIGAS-F               | ttccgaacagaagttagatgcccttcagaga<br>gggc                            |
|                                         |                                                        |                       | E3-dIGAS-R               | ctgaagggcactaactctgttcggaatcaa<br>cctc                             |
|                                         |                                                        | E3-T <sub>lip2</sub>  | E3-T <sub>lip2</sub> -F  | gtgccagacagatgcattctggcggtc<br>cgccaagaatgcatctgtctggcacagaa       |
|                                         |                                                        |                       | E3-T <sub>lip2</sub> -R  | atgaccac                                                           |
|                                         |                                                        | Int_E3-dw             | Int_E3-dw-F              | gagaatagcaacgaggtctc                                               |
|                                         |                                                        |                       | Int_E3-dw-R              |                                                                    |
| <b>For regulating lipids metabolism</b> |                                                        |                       |                          |                                                                    |
|                                         |                                                        |                       | S667-up-F                | taacctcacaccactc                                                   |
|                                         |                                                        | S667D-up              | S667D-up-F               | ccaccgtcgtcaagaggctactccaatgt<br>cg                                |
| 25                                      | ACC1 <sup>S667D</sup>                                  |                       | S667D-up-R               |                                                                    |
|                                         |                                                        | S667D-dw              | S667D-dw-F               | gacctcttgacgacgggtattctgtgtct                                      |
|                                         |                                                        |                       | S667-dw-R                | agagaagacacctgatgacg                                               |
|                                         |                                                        |                       | S667-up-F                | As above                                                           |
|                                         |                                                        | S667E-up              | S667E-up-F               | ccaccgtcctcaagaggctactccaatgt<br>cg                                |
| 26                                      | ACC1 <sup>S667E</sup>                                  |                       | S667E-up-R               |                                                                    |
|                                         |                                                        | S667E-dw              | S667E-dw-F               | gacctcttgaggacgggtattctgtgtct                                      |
|                                         |                                                        |                       | S667-dw-R                | As above                                                           |
|                                         |                                                        |                       | S1178-up-F               | gagtcggagccaagaacaac                                               |
|                                         |                                                        | S1178D-up             | S1178D-up-F              | tgggagacgtcatcagctcgagaccgag<br>g                                  |
| 27                                      | ACC1 <sup>S1178D</sup>                                 |                       | S1178D-up-R              |                                                                    |
|                                         |                                                        | S1178D-dw             | S1178D-dw-F              | gagctgatgacgtctccactttctgacac                                      |



|    |                                                    |                                    |                          |                                   |
|----|----------------------------------------------------|------------------------------------|--------------------------|-----------------------------------|
|    |                                                    |                                    | S1178-dw-R               | acgtggatgtttcggttgc               |
|    |                                                    |                                    | S1178-up-F               | As above                          |
| 28 | ACC1 <sup>S1178E</sup>                             | S1178E-up                          | S1178E-up-R              | tcggagacctcatcagctcgagacaccgagg   |
|    |                                                    | S1178E-dw                          | S1178E-dw-F              | gagctgatgaggctccgactttctgtacac    |
|    |                                                    |                                    | S1178-dw-R               | As above                          |
|    |                                                    | Int_E3-AC-up <sup>c</sup>          | Int_E3-AC-up-F           | tagttgcgttgttgatgcttgagttgagg     |
|    |                                                    |                                    | Int_E3-AC-up-R           | taactttttcgtgactctgttctc          |
|    |                                                    | P <sub>EXP1</sub> <sup>c</sup>     | P <sub>EXP1</sub> -F     | aaggccactaaggagttggcggcggttt      |
|    |                                                    |                                    | P <sub>EXP1</sub> -R     | tgctgtagatatgtcttgtgtg            |
|    |                                                    |                                    | E3-T <sub>pex20</sub> -F | aagtgtggatggggaagtgag             |
|    |                                                    | E3-T <sub>pex20</sub> <sup>c</sup> | E3-T <sub>pex20</sub> -R | catcaaacacgcaactaacatgaatgaatac   |
|    |                                                    | Int_E3-AC-dw <sup>c</sup>          | Int_E3-AC-dw-F           | aaactccttagtggccttctggcacagaa     |
|    |                                                    |                                    | Int_E3-AC-dw-R           | gtgaaggaaatgcctaaacctg            |
| 29 | Int_E3-P <sub>EXP1</sub> -MFE1-T <sub>pex20</sub>  | MFE1                               | MFE1-F                   | caagacatatctacagcaatgctcggagaac   |
|    |                                                    |                                    | MFE1-R                   | taagatacgac                       |
|    |                                                    |                                    |                          | acttccccatccacacttttagagcttagcatc |
|    |                                                    |                                    |                          | cttggg                            |
| 30 | Int_E3-P <sub>EXP1</sub> -FAA1-T <sub>pex20</sub>  | FAA1                               | FAA1-F                   | caagacatatctacagcaatggcggataca    |
|    |                                                    |                                    | FAA1-R                   | caatttcc                          |
|    |                                                    |                                    |                          | acttccccatccacacttctaagactgctcgt  |
|    |                                                    |                                    |                          | agcaact                           |
| 31 | Int_E3-P <sub>EXP1</sub> -POT1-T <sub>pex20</sub>  | POT1                               | POT1-F                   | caagacatatctacagcaatggaccgactta   |
|    |                                                    |                                    | POT1-R                   | acaacctc                          |
|    |                                                    |                                    |                          | acttccccatccacacttttactcggcaacaa  |
|    |                                                    |                                    |                          | ccagag                            |
| 32 | Int_E3-P <sub>EXP1</sub> -PEX10-T <sub>pex20</sub> | PEX10                              | PEX10-F                  | caagacatatctacagcaatgtggggaagtt   |
|    |                                                    |                                    | PEX10-R                  | cacatgc                           |
|    |                                                    |                                    |                          | ttccccatccacacttttatctgataggcaaca |
|    |                                                    |                                    |                          | agttctgc                          |
| 33 | Int_E3-P <sub>EXP1</sub> -TGL4-T <sub>pex20</sub>  | TGL4                               | TGL4-F                   | caagacatatctacagcaatgttcactcca    |
|    |                                                    |                                    | TGL4-R                   | gagtttcc                          |
|    |                                                    |                                    |                          | acttccccatccacacttttagcacgagtcag  |
|    |                                                    |                                    |                          | aacagttc                          |

<sup>a</sup>The common fragments used for evaluating the efficiency of GASs and fusing dIGAS and ERG20.

<sup>b</sup>Promoter and terminator sequence of gene XXX were represented by P<sub>XXX</sub> and T<sub>XXX</sub>, respectively.

<sup>c</sup>The common fragments used for regulating lipids metabolism.

**Table 4. List of primers used for qPCR in this work.**

| <b>PCR fragment</b> | <b>Primer name</b> | <b>Sequence (5'-3')</b> |
|---------------------|--------------------|-------------------------|
| qHMG1               | qHMG-F             | catacctcgccatcctcgac    |
|                     | qHMG-R             | atgtgggtccaatcagcagg    |
| qERG13              | qERG13-F           | ggtgagggtcgatcttggg     |
|                     | qERG13-R           | aatgagcatggcaacacagc    |
| qIDI                | qIDI-F             | catgaacacggaaaaggccc    |
|                     | qIDI-R             | atctgtgtgtgctggactg     |
| qERG12              | qERG12-F           | ctcactaaggtccagcaggc    |
|                     | qERG12-R           | atcttcgcacacagaagggg    |
| qERG19              | qERG19-F           | cccctgattcaccaggac      |
|                     | qERG19-R           | cattttgtgtcgagagccc     |
| qERG8               | qERG8-F            | accggctcttcaaacacgaa    |
|                     | qERG8-R            | tgctgaatacggcgatcaa     |
| qACT1               | qACT1-F            | tccaggccgtcctctccc      |
|                     | qACT1-R            | ggccagccatatacgagtgc    |

**Table 5. Synthetic GAS genes and endogenous DNA sequences used in this study.**

| Name         | Sequence (5'-3')                                                                                                                                                                                                                                                                                                                                                                                                                                                                                                                                                                                                                                                                                                                                                                                                                                                                                                                                                                                                                                                                                                                                                            |
|--------------|-----------------------------------------------------------------------------------------------------------------------------------------------------------------------------------------------------------------------------------------------------------------------------------------------------------------------------------------------------------------------------------------------------------------------------------------------------------------------------------------------------------------------------------------------------------------------------------------------------------------------------------------------------------------------------------------------------------------------------------------------------------------------------------------------------------------------------------------------------------------------------------------------------------------------------------------------------------------------------------------------------------------------------------------------------------------------------------------------------------------------------------------------------------------------------|
| <i>neGAS</i> | atgacccgacgaatcgccgcctctcccttctctgcccagtgaggccatcgccaccacttctgccccaacccaactgat<br>cctagaggcagacctctggggccgtgcccggacagcctgctggcctcgtcctgcccgtggacgccactcagttcgctct<br>tcctctgtctcgcacagcgaatcatgcagctgccccgactggagtgccctatcagccctctgtgacccccgccgatc<br>agatccacgagaacaccgtggagtgggcccaagccatgggcttcgcccgatctcagaagcacatcgacgccctgcgaga<br>ctctcgagtgggccacctgctggcccgaatctccccgccaccgacatggtggccctgcaagtggccgtggactgga<br>ccacctgttctgtctgacgaccgactggagcagatccacggcggctgctggggcccctacctgcaaacctgc<br>tggcgctgtccgagacggcggcccacctcagctgatcacccttcgccaagccttcggcgacctgcgagagcgaatg<br>ctggagctgcgagtgcccaactggatccccgattctcttctgtgtggagcactgttccaagccttcgtggacgagcca<br>agtaccgagccggcggtgggtgccccttcgctctcactctcgaatccgacagatcaccgtgggctgtacaccggct<br>tcctgtggcgagctgaccgacacatctctgcccccgactgctggagcagagctgtgacgacctggagcga<br>tctgcctctaccatcgtggcctggccaacgacatctacaccgtggagaaggagcagccaaggcgaggtgaacaaca<br>ccgtgctggtgctgatgcacgaggacggcctgtcttcgacgacgcctggcccgaaccgtgcagctgcacaacatcgag<br>atgcgagagttcgagcactggtggccgacctgcccctttcagcaggacatcgacgatcagctgcgacgatactgca<br>agtgtgatccactctctggtccacgccgactggggccgatctaccggccgatcagccccggcgacggcgggcg<br>ccgtgcgataa |
| <i>spGAS</i> | atccccgacatctccacccttccccctaccgaatctctccctacgtggcccgaagcccagagcactgaccgactggacc<br>cgacgaatcgccctgatcgagcagagggcccccgaagcattcgccaagccgacttcggctggttcgccccatgg<br>tgtacccaccggcagccactcagctaacctgatggccgactggttcgctggctgttctctggtggacgatcagctgg<br>acgacggctctatcgccgatctcccagcaagcccagacatcgtggacggaatcgagccgctctggagtctcccgga<br>ccatggcggcctgcccctgcccgatagagacggccctgtggctgtctctgcccggcaccctggtgagaaccgcc<br>ctcagccaccgccaactggcgaagacattcgtgcagcactggacgactgtctgaccgtcggccacttgggagggc<br>cggcaaccgagtgccggcaccgtgcccagcagggagacctacatcgagatcgacgacacaccggcggccatctactg<br>gtgtatgacctgatcgacattgtggagagaatcgacatccccgactctctgtacccgacgctcagttccgagccgctg<br>gacggcctgtaacgtggtgtgtggaccaacgacgtgactctctggccaaggagcagccctggggcaggtgcaca<br>acctggtgcacatcgtggagcaccaccgaggcctggatactcccggagccctggaccacgtgtgtgcccacccttacc<br>gagaccatgctgttctggagaaggaacgagagctctcggcccggaccgagcatcagccgtgctgctgctgctgctg<br>ggccggcatcgcaacctggatcgaggcaacctggactggtctcgtatctaccaagcgataccgacctggaggggcgac<br>gaggagatccgaccgacgagctgaggcctctctgatgaaggtgatcagtaa                                                                                                                     |
| <i>ppGAS</i> | atggtgcaagtggccgaggccgtgatcacctctgagaagcgaatccacgagctctgaggagaaggacggccgaccggcc<br>ctcgatgtgacctgtctgtgcaagtgcacccccacgaggacgacgccttcgagagacctgaagtggccacctcttc<br>ggcctgattcagccggcttaaggcctacgccaaggtgcagcagcccattctctatgctgatcgcctctacctaccct<br>acgtgaccggagatcagctcagctgatgtctgacttcgcccctgtggctgttcgctacgacgacgcctctgacaacctgaa<br>gatcatcaccgacacctctcactgcccctgtggagctggaggaccgaatgatcggcctgctgcagaaccgaaa<br>ggcgtgtgtggccgagcagctctacgctgtctgcagcctgtaagacctggcccggcctcagcccgtgctgaacatc<br>atgttcgaggagtacggcaccgactgtgtgctgatcgagacctgcaagacctgatggtgcgattcactcttggccctg<br>aggcctggctggcccgatggactcagacatggaggagctgctggccaccggattcgagcgatcttccacctgcga<br>ggcgagaccatgacccccaacgagtfacatccccgacgaatggacttctgcccgtgaaccctgtctggacatgaccgg<br>cgcttctgaaactggactgtgagatgctgtctaaacgcctgtatcggcagctggagaagctgtgtaacaagcacatc                                                                                                                                                                                                                                                                                                                                      |

tcttgggtgaacgacctgtacggcctgaagcgagacgtgtctgacggcaccaacttaacctggctgtgtatctctgacc  
acaccaagaacgccggccttcacctgtcaagacgcctctgatactgtgtgcagctctaccaactctgtctggaggat  
tcgtggacctgtctcccaagtgccccgggctggagctctacgtgcacccatggagttctggatgtctggctctctgttct  
ggcaccaagcctctgcccgatacaacttaaggagtaa

*hsGAS*

atgcgacctacacctgttcttccgacccctgggcatctcttcaaggccgagcttaagcaagagcttctcgagttcctgaag  
gaggccgtgacctactgtgcccggcctggagaactgtaacgtgttcgaccccaactctctggcgtgccctggcccacc  
tctctgcccggcgtgctcagtgtaagtactggaaaggctgaggaggctgccgccgagctgatggatcagattgtggcc  
gctgccccggagagcaaggctctctgccctctgagatggcctgtcttcttaagaaggccccaagcgacgagagctgct  
ggatactctgtgcccggccatgaacatgtccccggccaacgccggcagcccgaatcatggccaaggccaac  
ctgctgatctcatgcacgacgacgtgatcagctgagctgtgagcagcaccaccatcatcactctgccctggccgaca  
ccgccacccccaacggcaaggcgtggagatctgtggcagaaccgaatctcaaggagttctctgaggagaccaaccg  
agaggaccccggtggggccccgtgtcctgcaaggcatcctgaaactgggtgcagcacaccgagagaagctgcccggc  
tctatgaccttctctctgaacgagatcatcactaccgaatcggcacttcggcgtgacttctgtgacggccctgatg  
ctgacctgtgagatctctctgacccccggcagatggagccccggccaagctgcaccgactgtacatgaccttctctc  
tgaccaacgacctgtactcttaacaagaagagatcatggctcagcaagagaacggcggccgctgatcaacggcctgca  
gtctggagctgctctggacactactccccgagccgccaaggtgtgtctgagccttctgtggacctggagctgca  
gatcaacgaggagctgacctgactgtctctgcccggcctgtctcctctcagtgggcattcggcggagcatggtggaggt  
gtgtgccggcaacctgttctactctgccacctgtctgcgatacggccaagccggcctgcgaggcgtgtaa

*crGAS*

atgggctctcagatcctggagcctcagacctgcccagacctctgcgaggacagacctgcacctgcccacctgtctggg  
catctccgaggctggcccgtgatggccaacgccactacaacgacatcgctctgtgtggaggggccttcgaccgact  
gtgtaagtctcccaccatgcgagagaagtaccgacgagccaactacggccattcgtgtctgtactacccccacccaa  
ctgggaccgaatccccacctggcccctgtacatcactggctgttctgtgggacgacgccaatcagcaaggtctaaag  
ctgtcttctaacctgtgcacgctcagcttaaccgagcccacacctgcgagtgctggagcaagtgtgaacatgcccct  
tcgccaactctctggtggagtacgacgaggtggacggcagctgaagaccatcggcgagcagctgcagaagtctacacc  
ttcgagcagcgagagtgatcatggcccacatcgcaacctacatcagaactgtgacaaggagcagcttaccgactgga  
gggacacctgcccacctggagcttctaaaggagatcgacacggcaccgcccgtgtggacctgtgtccctgatc  
gagtacggcctggcgagaacatgcccgagcagctcgatacatggccgaggtgcagacctgtgtctgagacctctc  
gagccatctggatcacaacgacatcctgtctctgaagaaggagatccctcagttctctaccaccgagcttatcatcaac  
gccatccccatcctgatgtctgagtggtggcacaacctcagcaagccgtggagacctgctgcgagagctggtgtgtct  
gtggccacctcgagaaggccgtgcccactctctgaggccgtggccaagagcgacgagagtgatgagacctact  
gtgacgctgtcagatgtatggtgaccgctctattcagttcacctacgagcttaccgatacggcctggccggctgtctgaa  
gaggacggctctctgtctatggtgctgtaa

*dlGAS*

atgcgacctacacctgttcttccgacccctgggcatccccctcactctaacaccaagtacgagcttctcgagttcctgaag  
gacggcatcttaacacctgcccggcctggagaactgtgacgtgttcgaccccgatctatcggcgtgccctggcccacc  
ctgatccccggcgtggtcagtgtaagtactggcgagaggccgaagaggtggccgagggcctgatggatcagattgtgtc  
tgctgccccggcgagcaaggctctctgcccggcagttaccatctctccctcaaggggcctaagcagcgagagctgct  
ggacacctgtgtggccgctatcaacatgtccccgctgccaacgccggcagcccactgatggtgagggccacc  
tgctgacctcatgcacgacgacgtggtggagtctaccgagcagctaccatcatcagcagcaccctggccgacatcgtgg  
gccacgaggagaagtctaccgaggtgctgtggaagaaccgaatctcaaggagttcacctggagtgatccaaggagac  
cccgtggtgggccccctgtctgaaaggcatgctgttgggtgcagcacaccgagacaacctgcccggctctatgacc  
ttcaagtctctgaacgactacatcactaccgaatcggcagctggcgctggacttctgtaacggccatcatgctgacct  
gtgaggtgtctgtctcctctgagatggagccccggcaccctgcaccacctgtacatgaccttctctctgccaac

gacctgactcttacgacaagaggtgtacgcatgaagaagcacggcgccgacctgatcaacggcgtgcgagtgctgga  
gctgctctgtctacctctccccgagccgaaggtgctgctgcgagcctacctgtgggacctggagttcagatcaacgag  
gagctggcccactgtctgactgtggcctgtcttaacatcagtggcgattcggcggagcaggtggtgaggtgatcgccggc  
aacctgttctactcttctacctgtctgcgatacggcaagccctctctgaagggcatactaa

*deGAS*

atgcgacctcactgttcttccgacccctggggatccccctcactctgacaccaagtacgagcttctcaggttctgaag  
gacggcatccacaacgacgtgtctggcctggagaactgtgacgtgttcgacccccgatctgtggcgtgccttgccccac  
cctgctgcccgcctggctcagtgtaagtactggcgagagggcgaaagaggtggccgagacctgatgaaccgaatcgtg  
tctgcccccccaaggagcaaggtctctgcccgccgagttcaccgactctcactgaaggaggccaagcagcgagagc  
tgctggacacctctgtggcctgccatcaacatgttccccgcccaacgccaccgagccccactgatggtgaaggcc  
accctgctgacctcagcagcagcagcgtgatcagctaccgagcagctaccatcagcagcagcgcctggccgacatc  
gtggccaagaggaaagggcaccgagatctcttgaagaactctatctcaaggagttccatggagtgatcagagga  
ggaccccggtggggccccctgctggtgaaggcatgctgtctgggtgcagcacaccgagacaacctgccccgctcta  
tgacctcaagctctgaacgactacatcactaccgaatcggcgacctggcgtggactctgtaacgcccatcagct  
gacctgtgagatctctgtctccctctgagatggagccctggccacctgcaccgactgtacatgaccttctctctga  
ccaacgacctgtactcttacgacaaggagctgtacgcatgaagaaccacggcgccgacctgatcaacggcgtgcgagtg  
ctggagatcctgtaacgccacccccgagccgcaaggtgctgctgcgagcctacctgtgggacctggagttcagat  
caacgaggagctgacctgctgctcactgcttacaatcagtggcgattcggcggagcagctggtgaggtgct  
ggccggcaacctgttctactcttacctgtctgcgatacggcaagccctctctgaagggcatactaa

*hlGAS*

atgtctactcagatcttccctcttctctcagaacgagaagatccacaagatcctgcgaccaccaagaagctgcagccct  
ctgtgtggggcgagcgattctcactacaacatctctgagcaagagctgcgatacaagcagcaacaagtgaggagctg  
aaggccgtggtgaagaaggagatctcggcgagctgctctacgactgtctcatcagctgaagctgatcaacgtgctgaa  
cgactcggcctgttcttaccactcagctgtgagatcgagaacgagctggagctatctacaacaagctgtggatcagaacta  
catcctgaaggagcagaacctgcagcagcctctctgcgattccgactgtgcgacagcagcgttccgagtgcttctgcc  
gacatctcagaagftcaaggacgagcagcgaactcaaggagtgctggtgctgacaccatcggcctgctgtctctgt  
acgaggcctctcactgttctgtggcgagaacatcctggacgagcctggacttaccactaccacctgaccgagtt  
cctggccaacaagaagagcagcagcaccctctctaaagaatctctcaagccctggagcgaccctgcgaaagtctc  
tgagcgactggcccccagactcactctatctacgcaaacgagacctctcaacaagtgctgctgcagctggcca  
agctggacttcaacctgctcagctatccacaagaaggagctgtctgagatctctcagtggtggaaggagctgacttctg  
cacaagftccccctcggccgagaccgaatcgtggagctgtacctgtggatcctggccgtgtactacgagcctcagttactacc  
tgcccgaacatcctgaccaagaccatcgccttgccctctatcggcagacatctacgacgagtacggcaccatcag  
gagctggagctgctgaccgagccgtggagcgtgggacatcaactcagcacaagctgaaccccgagttacctcaga  
ccttctacaaggagctgctgaactcttacgaggagttcagcaagccctgtctaaaggaggagacctaccgagtgactacg  
ccaaggagcgattcaaggagctcctcgcgacttctctggaggtggcctgggtgctgaaggaggccgagtgcccttctc  
acgagtacctgaagatctctgatcaactgtggtaccacatgctgctgtctctctgatcggcagaaaggctctatcgt  
gaccaaagggtgttcgagtgctgtctatcaccgaaagatcgtgcgagcctctgtgacctctgctgactgatggacga  
catcggcagtaacaattcagcaagagaaaaacgaggacccctctgcccgtggagtggtacatgaagcagttacggcgtgt  
ctgaggaaggccctacgacgagctgaacaagcagtggtgaacgcctggaaggagatcaacgaagagctgctgaagc  
ccaccggcgtggcctctccatcctggtgcgagccctgaacttctctaaftcatggacctgttctacaagaacggcgacgg  
ctacaccaagtgggcaaggtgaccaagcactctgtggcccccctgctgatccacccatcccctaa

*lsGAS*

atggccgctggacaccaacgccaccatcaagagaagaccaccgccgagccctgagccctggccaacttcccc  
ccctctgtgtggggcgaccgattcctgtcttccacctggacaactctgagctggagggttacccaagccatggagggc  
cccaagaggagctgcgacgactcagctggatcagacctgacttaacaagaagctgtctctgatctactctgtgacc

gactggcctgacctacgttctgcaagagatcgaggctcagctggacaagatctcaaggagttaacctgcagaacta  
cgacgaggtgacctgtacaccacctatcaactccaagtggtccgacacctgggctacaagctgcctgtgacctgttca  
acaagttcaaggacaacctctggccttcaaggagacatctaccgacgtgaagggcatgctggcctgtacgaat  
cttctcagctgcgaacccgagggcagctctatcctggacgagcctcttcttaccgagaccaagctgaagctgtggtgaa  
caacctggagggcaacctggctcagcaagtgtcagctctcgcgacaccttccaccaaggcatgccatggtggagg  
cccactgtacttcttaactactgtaggagtgtccaccacgagtgctgtgaagctggccaagctgcacttcttacc  
tggagctgcagcagaagaggaaactgcgaatcgttcaagtggtggaaggacatcgattccaagagaccaccctac  
atccgagaccgagtgcccagatctacctgtgatcctcggcctgtactcagccccgatactctgtgcccaaatcatcg  
ccaccaagatcacctgttctggtgtgctggacgacacctacgacgctacgccaccatcgaggagatccgactgtga  
ccgacgccatcaaccgatgggacatgttccatggagcagatcctgaatacatccgaccttctacaagatcctgtgga  
cgagtacccgagctggagaagcagctgcccacgagggccgagccaagtctgtatcgctctaaggaggcctccaa  
gacatgcccgaggctacctggaggaggccgagtggaaccaactctggctacgtggcctcttccccgagtacatgaaga  
cggcctgatcacctctgctacaacgtgatcttaagctgcctgggtggcagtgccgacatcgtctctgagaacgctctg  
gcctgtacgagctcaccacaagacctgcaagcctctgagctgatctctcactgcaagacgacgtgatgacctatcgt  
tcgagcgagagcgaggacagctgccaccggcgtggacgcctacatcaagacctacggcgtgtctgagaaggaaagccat  
cgacgagctgaagatcatgatcgagaacgctggaaggacatcaacgaggctgtctgaagccccgagaggtgtctatg  
gacctgtgccccatcctgaacctggcccgaatgatcgacgtggtgtaccgatacgcgacggctcacctccccggc  
aagaccatgaaggagatcacctcgtgttcgtggcctctgtctatgtaa

*ERG20*

*(YALII\_E0  
6759)*

atgtccaaggcgaaattcgaaagcgtgttccccgaatctccgagagctggtgagctgctcgagacgagggtctgcc  
ccaggatgccgtgagtggttccgactacttcaactgtgtgggtgaaagctcaaccgagcctgtctgtggtc  
gacctaccagctactgaccggcaagaaggagctcgtacgagaggtactaccgactcgcgctgctggctgctgat  
tgagctgctcagggcgttttctcgtgctggacgacattatggatgagtcgaagccccgagagccacctgctgttac  
ctcaagccccagctggcatgattccatcaacgatcttcatgctagagagtgccatctacattctcttaagaagcattc  
cgacaggagaagtactacattgacctgtcagctgttccacgacatttctcaagaccgagctggccagctggtggatc  
ttctgactgccccgagatgaggtgatcgaaccggttctctggacaagcactccttattgtgcgatacaagactgctta  
ctactcctctacctgcccgtgtctagccatgtacgtggccgacattaccaaccaagacctgcagcagccatggatg  
tgctgatccctctcgagagctactccaggtccaggacgactacctgacaacttggagacccccgagttcattgtaagatc  
ggcaccgacatccaggacaacaagtgtcctggctcgttaacaagccctcagaaggccacccccgagcagcgacaga  
tctcagaggacaactacggcgtcaaggacaagtccaaggagctcgtcatcaagaaactgtatgatgacatgaagattgagc  
aggactacctgactacgagggaggtgtgtggcgacatcaagaagaagatcgagcaggttgacgagagccgagcctt  
caagaaggaggtgctcaacgcttctcgcgaagattfacaagcgacagaagtag

*MFE1*

*(YALII\_E1  
8441)*

atgtctggagaactaagatacagcgaaagtgctcattgttaccgggtgccggtctcgtaaggcatacgccttt  
tctacggctctcgaggacctctgttgttcaacgatcttgggtgacttcaaggcgagctgcccaggtggcagtg  
caagcaggtgccgatgtgtcgtcagcagatgttccaaggaggcaagcgtgttctaactacgactgtcgaagc  
ggtgacaagattgtcagactgccgcaaggctttggctccgacattgtcatcaacaacccggtattctccgagatatt  
tcctcaagaagatgaccgacaaggactgggatctgtctacaaggtccacgtttcggctcacaaggttaccgagctgc  
ctggccttactccgaaagcagaagtacggtcaggtatctctaccttccgctgctggtcttaccgaaactcggccagac  
caactactccgctgccaagctcgcctggtgttccggtgagactctcgaagggggtccaagtacaacattactcc  
aacgtcatcgtcctctgtgcttcccgaatgaccgagacagtcattgcccagagatatcctcaagctcctcaagcctgagta  
cgttgttctctgtgctgctacctcaccacgactctgaccgagcttattgtatttacgaggtcgtgctgttactatggct  
aaaatccgatgggagcgagcaacggtgctgtttcaaggcgacgacacttaccctgctctattctgaagcagtg  
gatgaggtcacctctttgagagccccacctaccctaaccggcctgctgacttctcaaatcagctgagagctgttgaagc

accgagaacccccaggacacacgtctcctcaaggaccaggtgtcattgtcactggagccggctggcattggccg  
agcttactctaccccttctaagcttggccaaggtcgttgaacgatttcggtaacccctcagaaggtgtcagataaatt  
aaggccctcgggtgatccgctcgtgacaagaacaacgtcatccacggtgagaaggtgtcagaccgctatcgacgcc  
ttcgggtgtgtccacccgttgaacaacgctggtattctccgagacaagtcttcgccaacatggatgatgagatgtggca  
gctgatcttggatgccacccaacggtacttactccgttaccaggccgctggccccacttcttaagcagaagtacggcc  
gtgcatcaaacaccctcaactctggtatctacggtaactcggccaggccaactactctgccccaaggctggtatcctc  
ggttctcccagctcttctcagaggggtgagaagtacaacattctgtcaacaccattgcccctaacgctggtactgcatg  
actgcttctgtcttactgaggagatgctcagctctcaagcccatttcacgcaccatcaccgctcgttcttccgcatc  
aggctcccgtcaccggtgatctgtttgagactggttctgcttggatcggacagactgatggcagcgagctggtgtaaggc  
cttaacaccaagaagggtgtcacccccgaatggttcgagacagctgggctaagatcgtcacttcgatgatgtaactcc  
accatcccaccactccctccgagctactactcagattcttgagaacatctcaacgtgctgatgaggaggtgaggagac  
tgctctgttctgtggtcccgggtggtcccggatcctcaacaaggaggcgaaccttctgactacacttacitaccgagacc  
tcattcttacaaccttggctcggccaaggctaagagctcaagatgtcttcgaggggtgatgatgacttccagaccgtgc  
ccacttctgggttatccctacatgggtggcctcatcactaccaactatggcgacttcttcaactcaaccctatgatcttc  
tccaggtgagcagctacgtgaaatccgacagtggcctattcctaccaatgctacattggagaacaaggctaaggctatgat  
gtcgttgacaaggcaaggctgcccctctgtcactgctaccaccaccgaacaaggagactggtgaggggtttctac  
aacgagtcttctcttcatccgaggtctggtggttcgggtaagtctaccggtactgaccgtggcgctgccactgctgcc  
aacaagcccctgctcagctcctgacttctgtaaggagatcaagatccaggaggaccaggctgccattaccgacttctg  
gtgattacaacctcttcatcagaccctgttctgtctgttggtaactttgaccgacctatctccaggtctctcttttgg  
tgtctccgtaaggctcttaccatcagttgtccttcaagaacgtaaggctccgatttctggtcagcttccctggtgag  
accctgaagggtgagggctggaaggaggcaacaaggtcatttccagaccaaggttggagcaggtactaccgcat  
cagcaatgccgccattgagctcttcccgaaggatgctaagctctaa

*FAA1*  
*(YALII\_D*  
*22124)*

atggtcggatacacaatttctcaaaagcccgctgctgggtggagctggccccccaagcctggcgagactgccccccgacg  
aaacgtcattgccaaggacgccctgtcgttccccgacaacgactcgtccctgaccaccgtctacaagctgttcaaaaag  
tacgccgagatcaacagcgagcgaaggccatgggatggcgagacaccatcgatccacgtggagaccaaacaggtg  
accaaggctgtgagcggagtgagaagaagggtcccaaggaaatggaagtactttgagatgggcccttacaagtgctctc  
atacaaggaggcccttaagctggtccatgattatggagctggtcttcgacacctcggaatcaagccaaggagaagatgca  
catttacgccagacctcccaccgatggatgctctctgacctggtctctctgctcagggatattccattgtcactgctacgac  
actcttggagaggagggtctcactcgtatctcaggaagaccaactcggctcatcatgtttaccgacaaggctctgctgagctc  
tetcaaggtctctcaagaaggaccgatctcgaatcatctacggaggtgatctgacccccgacacaagaaggc  
cggaaacacggagattgacccatcaaggagattgtccagatataagatctacaccatggacaggtgtcgtctcgg  
ccgagaacacccccaccccgaggaggctcactatgaggacctggcctcatcatgtacacctctggttctaccggtgc  
cccgaagggtgtggttctcagcacaagcagatcctcgcctctgtggccggtgtcaccagaatcattgaccgatctatcgtc  
gcaacacagaccggttctcaactctgccccctgcacacatttctcagtttgttctcagatggtcaccttctggtcgggtg  
cttctctggttacggaaccgtcaagaccatttccgatctgcatgaagaactgtaaggagacattcgagagctcaagcc  
caccatcatggtcggcgttcccgtctgtggaaacctatgcgaaagggtattcttggcaagatcaaggagctgtctctctga  
tgacgggggtcttctggcctcatttccgccaagcagcgtctcagcagaacggactccctggtggatctatcctcagctc  
gctcatttcaagaaggtaaggacgccactggaggtctctccgatacgtgtgtaacggaggtgctccagatctgtcagac  
accagaagttcatcaccactctcatctgcccattgctgattggatcgggtctgaccgagactacagccaacaccaccatcat  
gtcgcctaaatctacgcttggaccattggtgagcccaccgcccgtgacctcaagctcattgactgctgaaaggc  
ggctacttcccgaacaaccaggagagctgtgcatcaagggaacgtcgtgatgaaggagtactacaagaacgagg  
aggagaccaagaaggcgttctccgacgatggctacttctcaccgggtgatattgccgagtgaccgccaatggccagctca

gaatcattgaccgacgaaagaacctcgtcaagaccagaacggagagtagcattgctctggagaagctcagacacagtac  
cgatcgtcgtctacgtggccaacctgtgtgtacgccaccagaaccgagtaagcccattgctctggcattcctaaccg  
agggccccaccaagaagcttggccagagcttggcgctcattctgacgactgggacgccgtctgctcaaaaaaggtg  
gtcaaggctgtgctcaaggacatgctcgataccggccgatctctgggtctgtccggcattgagctgctgcaaggcattgtgt  
gctgcctggcgagtggaactcctcagaacagctacgtgctgcccagaagctcaaccgaaagaagattgtggtgataa  
caagaaggaaattgatgagtgctacgagcagcttag

*PEX10*

*(YALII\_CO  
1416)*

atgtgggaagtacatgcatcctgctggtgaatctgatctgacactacaactacaccaggccaacatgagcgacaata  
cgacaatcaaaaagccgatccgacccaaccgatccggacggcaacgcctgccttacgtggggccgagaaatcatccg  
agccaaccgaaagaccactactttagtccgtgctgaacagcatctgacgctttctgcagaaatggaaggagtagca  
ttatccaccagtagaaggagctggagacggcgccaagttgcatatctcggttgtagctgtgggctccaagac  
tctcggagaagtagtaccaatctcatgtacactatcagagaccgaacagctctaccgggggtgtagacggttgcta  
cgtgcttccaacactctgttccatcctgttgcgctacatggcaagttgcgcgccaactgatgcgcgagatcccca  
tctggtggagtagcgaagatgagcctgtgcccagcccgaacaatggaaggagcgggtcatcaagacgtttgtaaca  
agtttgacaagttcacggcgctggaggggttaccgcgatccacttggcgattttctacgtctacggctctactaccagctca  
gtaagcggatctgggcatgctgtatgtatttgacaccgactggacaagaatgagcctcgaatcggttacgagatgctcg  
gtctgctgatttcccccgttggccacgtcattgtgtagacgggaagagtagcctggagcgtgctggaagagcgt  
ggagaagaggcaggggagaaggaagatgaaaaggaagcgggtgtgcccgaagaaagtagtcaattccgttcattgag  
gatacagaaggggagacggaagacaagatcgtgtaggaccctcgcagctcaagttcattcctgaggcgtccagag  
cgtgcaactctgtgctgcatcattagtcgcccggcatgtacgcatgtggacacttttctgtgggactgtattccgaatgg  
gtgagagagaagcccagtgctcctgtgctggcaggggtgtagagagcagaactgttgcctatcagataa

*POT1*

*(YALII\_E2  
2238)*

atggaccgacttaacaacctcgcaccagctcagcagaaccccgaaggcctcagcgtatcacctccaagaacc  
ccgatgactgtgtcatcaccgccctaccgaactgccacaccaaggaggcaagggtctgttcaaggacaccttctt  
ccgagctcctcctctcgtgagggctcgtcaaggagtcgaagatcgaacccaagctcaggtgatgctcgtcgcg  
gaaactctcgtcgcgggtccggtgccaactgagcaccgagctgcctgccttggccgcatccccgagaccgttccctt  
cgtcgtctcaaccgacagtgctcctctggtctgatggccgtcaacgacgttccaacaagatccgagccggccagattga  
cattggtatcgctgtggtgctgagtcacatgccaaccagtagcgtcccaactccgtcacccttctccaacaagttccaga  
acaacgaggaggtcaagaagtcctgatccccatgggtatcactccgagaacgttccccaagtacaacgtgtcccga  
aagcccagagccttctgccaagtctacgagaagggccgctgcccagggccgggcaagttcgaccaggag  
atcctccccatcaagaccactgttctcgtgatgatgacaacgagaaggaggtaccgtcaacaaggacgacggtatccga  
cctggtgacaccgagagaagctcggcaagctcaagcctgcttctccggaggaaccaccacgctggtaacgcctc  
tcagatctccgaggtcgggagccgttctcctatcgcagatctgttccgagaagcttggcagccatccttccaag  
ttgtccactgcaagaccgtcgggttcccccgagctatgggaattggccccgttacccattcctgctgcttggagga  
cctggtctgaccgtcaacgacgttgacgtttctgagatcaacgaggttctgcttcccaggtctgttctccatccagcattgt  
ggaatcgacgagtcgaaggtcaacccccgaggtggtgcaattgctattggccacctctgggagccaccggctcgcaca  
gtttgccactctgctcctccgagcttaaggagctggcaagaaggtcgggtgcacctccatgtcattggtaccggtatgggtg  
ccgcttctggtgttgcgagtaa

*TGL4*

*(YALII\_F1  
3550)*

atgttaccctccagatttccgaagcaagcaccaccaactttatccggccgacggcaggtctcacatccacttttttgcct  
tcacgccgcaacctccaccaactgctgctcatgctctaccaactgcttggagacggctacctcaagtcgttctgcacaca  
ggatcacgctgcccacaagctcggggcttccgggtatctcaacgccttgacttcagaggccaaactcggatcgataaa  
cggctcatcatcaaaaagctgtagaggaccaggaaaacgcgagctgfactttgactggtcgaaggctccagcgaact  
cgactatctgctcggcaaccggaatggaagaaagagacgagtgccagcttacgattacgaatcgtccgactccgatt  
ggacgaactgagacacccccaaccaataacgacaccaccgactgctttacctcgtcgaacaacgtggagtagaaca



ctcggcaacctcggagacgtcaagctctaccacaactcctttaccggaaccaaacgactcatcgaagactacattctggaat  
gcaactggctcaacgcgctcctggcagccggaacgacaagatcccggaccaggagctcctcagcagctgctcaa  
caccagaaaggcattggacgaactgcccttctgctgtccggcgaggatgtctcggctcctccacaccgggttctccag  
gccctctcagacacatcgtcttgcacacgtcatatcgggttcgtcggcaggctcaatcatggccgaggactgtgcatc  
acaaagacgaagaacacgaggcttcataccgagctcatggagcggagactttgacatttgaagagtcggaaacgaa  
gacacgggtcgaacgagtgctcgaatgctcaaacatggatcgtactcgaacagatatagcagacacatgcca  
gaattattggcgacatgaccttctggaggctacaaccggactcggctattctcaacgttacggatcgtctgctggcatc  
acgaaatgcctcgttctcaactacctgacggcccaacgtactcattggtcggctgtcgcctcctgctcgggtgcctc  
tcatttcaatgctcactctgcttgaaggagcccaaacaggagctattcagacctggaacgcttctcgtcgggttca  
ttgacggatccgtctatgccgacgtgccattgcgctctcagaatgtcaatgtaaatcattcattgtctcgcagtaaa  
ccctcacgttgccttctcaagctcacagaagacaaggccaaccggactcggctcgaacatctacacgtcaagctt  
tggcacaactcaagacgtggtcaccgacgaggtcatgcaccagttgcaggtgctgtacgagtttgcacttcaagaacc  
tgtgtcgaagaatgggagcgtactgtcccagcagatacaggagacatcaaatcctgccccaggctcctctcagagct  
cccgggaattcttactaacccactgcccagacatgaaggacaccaaccgacgaggtccccaggccacttatcgaagat  
ctcgtcattcgaaacactgtgccattgagttggcgtggtcagctatccacgaactcaaggcccgtatgtccccctca  
agcttggatcaggacgtacatccccgcaaggacttitaagcattcgcagctgtccaaccagatttctcgcctcaaacctctt  
ctcgtcatatgtctctcatcggcaaccacagcacatacgcgtcttcggaaccgaaagtcgttctcatgcacgtatcaaga  
gtgatcggccgctgtgttcgacaaggagcctattcacgagacgccaagtcgtcgcctcagagctcgtatgtcaactgca  
ccgatctgcaagtgagcggctgagacgaccaagctgcatcattcaatctgggctctctccgacctctcttcatccgc  
atctgaccactcctatgtctatggggggagccaatcagcgcctctgtacaatcctggcgcggttctgtgtctcagaacac  
ctcccctgggacaaaatccccggaacgctgatccgtcgtactttgatggaccaacaatgtgcgttccactgggacagc  
gacgacgacgatgtcgcgagagacggagttcctaacaacatgtctctcgtcttcacgaagatttctcgtccagagtcg  
tcgagccagttgatggactcgaactctgtctatccaccgccaccaggtcaccgacggttccgtcgtccagcagacc  
gtcccagcgtgggagagcatttccagctgttgaaggggacgagaactgttctgactcgtgctaa

*P<sub>TEFin</sub>*

gagaccgggttggcggcgtattgtgtccaaaaaacagcccccaattgcccccaattgaccccccaattgaccagtagcggg  
ccccccccggcgagagccccctcacccacatatacaaacctccccggttccacacttgcggttaaggcgtagggta  
ctcagctcgaatctacgcttgcagacttctactagttcttctgttgccatccgggtaaccatccgggacgcaaaata  
gactactgaaaatcttcttctgtgtggtggacttttagccaagggtataaaagaccaccgtccccgaattaccttctcttctt  
tctctctctctgtcaactcacaccgaaatcgttaagcatttctctgagataagaatcattcaaaatggtgagttcagagg  
cagcagcaattgccacggccttgagcacacggccgggtgtgttccattcccacgacacaagacgccacgtcatccga  
ccagcacatttgcagtactaaccgag

*P<sub>GPD</sub>*

gacgcagtaggatgtcctgcacgggtcttttgggggtgtggagaaagggtgcttgagatggaagccgtagaaccg  
ggctgcttgggggatttggggccgctggctccaaagagggttaggcatttctgtggggttacgtaattgcggcatttgg  
gtcctcgcgcgatgtccattgtcagaattagtcggataggagacttatcagccaatcacagcggcggatccacctgtag  
gttgggttgggtgggagcaccctccacagatgagtagcaaacagcagcagcaacatgatagttgggggtgtcgtgtta  
aaggaaaaaaaaagaagcttgggttatattccgctctatttagaggttgcgggatagaccccacggagggcaatggcg  
ccatggaaccttgcggatcgtacacggcgggactgcgtccgaaccagctccagcagcgtttttccgggcccattga  
gccgactcgcaccccgaacgtgtcttggcccacgactcatgtcatgttgggttgggagccacttttaagtagcacia  
ggcacttagctcgcagcaaggttccgaacaaagaagcggctgcagtggtgcaaacggggcggaaacggcgggaaa  
aagccacggggcagcaattgaggcacgcctcgaattttagacgagtcacggccccattcggccgcaatggctcgc  
caaccccgtcttctgaccacatcaggttaccacaagccaaccttctgttaaaaagcttaacatattataccgacgtag



### Supplementary References

1. K. Tunyasuvunakool, J. Adler, Z. Wu, T. Green, M. Zielinski, A. Zidek, A. Bridgland, A. Cowie, C. Meyer, A. Laydon, S. Velankar, G. J. Kleywegt, A. Bateman, R. Evans, A. Pritzel, M. Figurnov, O. Ronneberger, R. Bates, S. A. A. Kohl, A. Potapenko, A. J. Ballard, B. Romera-Paredes, S. Nikolov, R. Jain, E. Clancy, D. Reiman, S. Petersen, A. W. Senior, K. Kavukcuoglu, E. Birney, P. Kohli, J. Jumper and D. Hassabis, *Nature*, 2021, **596**, 590-596
2. A. Jurcik, D. Bednar, J. Byska, S. M. Marques, K. Furmanova, L. Daniel, P. Kokkonen, J. Brezovsky, O. Strnad, J. Stourac, A. Pavelka, M. Manak, J. Damborsky and B. Kozlikova, *Bioinformatics*, 2018, **34**, 3586-3588.
3. S. Dale, W. A. Wilson, A. M. Edelman and D. G. Hardie, *FEBS Lett.*, 1995, **361**, 191-195.
4. S. Shi, Y. Chen, V. Siewers and J. Nielsen, *mBio*, 2014, **5**, e01130-01114.
5. C. Holkenbrink, M. I. Dam, K. R. Kildegaard, J. Beder, J. Dahlin, D. D. Belda and I. Borodina, *Biotechnol. J.*, 2018, **13**, e1700543.
